# Supplementary material for: Do patients with chronic unilateral orofacial pain due to a temporomandibular disorder show increased attending to somatosensory input at the painful side of the jaw?
Source: PeerJ. 2018 Jan 24;6:e4310. doi: 10.7717/peerj.4310 (PMC5786881; doi:10.7717/peerj.4310)
Supplement: Data S1 — The file contains the raw data for all behavioral and self-report variables collected in this study. Also included is a tab in which all variable names are explained. [file peerj-06-4310-s001.xlsx]

## Sheet: Van Damme TMD
subject	sex	age	SES	hand_dominance	group	painlocation	PSS_original	JND	PSS	tactor_intensity_left	tactor_intensity_right	int_obj_affected	int_obj_other	mean_objective	intensleft1	intensleft2	intensleft3	intensleft4	intensright1	intensright2	intensright3	intensright4	meanleft	meanright	meanintensity	mpiin	mpips	mpilc	mpiad	mpisu	tsktmdtot	tskaa	tsksf	pcstot	pcsrum	pcsmag	pcshelp	PVAQpain	PVAQchan	PVAQTOT	mpi1	mpi2	mpi3	mpi4	mpi5	mpi6	mpi7	mpi8	mpi9
1	2	59	4	1	1	2	-66.49	76.0642	66.4877	22	22	22	22	22	7	6	6	6	7	7	6	7	6.25	6.75	6.5	4.7	4.33333	3.75	4.33333	#NULL!	25	12	13	6	2	1	3	41	28	69	4	4	5	5	#NULL!	3	3	4	6
2	2	24	5	1	1	2	-31.14	68.8187	31.1439	25	15	15	25	20	7	3	4	4	3	4	4	4	4.5	3.75	4.125	1.63636	1.33333	4.25	3.66667	3	20	13	7	0	0	0	0	20	14	34	1	0	0	3	3	3	1	1	3
3	2	35	4	1	1	2	-0.41	74.1664	0.41	20	14	14	20	17	1	1	0	0	5	3	2	2	0.5	3	1.75	2.27273	2	4	2	1.66667	14	9	5	25	8	6	11	28	21	49	2	2	2	2	2	4	2	2	2
4	2	30	3	2	1	2	-23.86	131.464	23.8614	20	14	14	20	17	3	2	3	4	4	3	3	4	3	3.5	3.25	0	1	4.75	1.33333	2.66667	25	16	9	39	12	10	17	39	24	63	1	0	0	0	2	4	0	2	5
5	2	41	3	2	1	1	-25.75	75.5285	-25.7526	21	18	21	18	19.5	10	10	10	10	10	10	10	10	10	10	10	0.3	3	2.75	0.333333	#NULL!	26	17	9	6	4	1	1	33	27	60	4	1	0	2	#NULL!	5	3	3	0
6	2	54	2	1	1	1	-53.44	54.3914	-53.4402	28	18	28	18	23	5	5	4	3	7	7	6	5	4.25	6.25	5.25	5.16667	1.33333	4	2	4	27	19	8	27	11	4	12	21	16	37	4	4	6	6	4	4	2	0	#NULL!
7	2	53	5	1	1	1	7.33	58.4899	7.32843	25	23	25	23	24	7	8	7	7	9	8	7	7	7.25	7.75	7.5	4	3.33333	4	4.66667	4.33333	36	25	11	19	5	4	10	27	15	42	2	5	5	4	5	2	4	4	5
8	2	34	3	1	1	2	-25.26	59.0832	25.2586	23	23	23	23	23	5	5	5	5	7	7	7	5	5	6.5	5.75	4.45455	2.66667	3.5	2.66667	4.66667	24	17	7	23	9	4	10	29	23	52	1	5	3	6	5	3	3	3	4
9	2	45	2	1	1	1	70.41	70.5669	70.4131	31	33	31	33	32	9	8	8	8	9	9	9	9	8.25	9	8.625	2.36364	3	4.25	2.66667	4.66667	40	27	13	44	12	12	20	32	21	53	1	3	3	3	4	3	0	5	3
10	2	23	4	1	1	1	62.99	110.734	62.9922	27	22	27	22	24.5	5	8	8	8	5	6	6	8	7.25	6.25	6.75	1.18182	1.33333	4.75	2	3.33333	27	17	10	8	4	1	3	36	26	62	1	2	4	2	6	6	0	2	5
11	2	27	5	1	1	1	-39	56.5146	-39.0015	25	24	25	24	24.5	3	3	3	4	5	4	5	5	3.25	4.75	4	0.636364	1.66667	4.25	1.33333	4	19	14	5	18	11	2	5	30	17	47	2	1	0	1	4	5	1	2	2
12	1	46	5	1	1	1	-6.48	68.6524	-6.483	24	19	24	19	21.5	5	6	6	6	4	5	5	5	5.75	4.75	5.25	1.45455	1	1.75	2.33333	2.66667	18	11	7	32	12	5	15	31	24	55	1	2	1	3	3	5	1	1	1
13	1	29	5	1	1	1	28.12	59.0863	28.1191	24	18	24	18	21	3	5	5	4	7	7	7	7	4.25	7	5.625	1.27273	3	4.75	1.66667	2	24	13	11	12	6	4	2	37	14	51	3	1	1	5	2	5	0	3	5
15	2	22	5	1	1	2	19.66	66.6951	-19.6572	27	26	26	27	26.5	5	5	5	5	5	6	6	5	5	5.5	5.25	0.3	0.666667	4.5	1.33333	#NULL!	22	16	6	8	3	2	3	15	24	39	0	1	0	0	#NULL!	5	1	1	5
16	2	43	3	1	1	1	-9.54	74.2344	-9.53537	24	26	24	26	25	3	3	2	3	3	3	2	3	2.75	2.75	2.75	5.8	3.33333	4.75	2.33333	4.33333	27	19	8	26	9	4	13	28	22	50	2	6	6	6	6	4	4	4	4
17	2	49	4	1	1	2	-58.37	109.938	58.3721	25	23	23	25	24	2	2	2	2	5	5	4	4	2	4.5	3.25	0.636364	1	5	1	3	25	17	8	7	1	3	3	11	11	22	0	3	0	1	3	5	1	2	3
18	1	38	3	1	1	2	-31.5	74.4804	31.4991	26	24	24	26	25	4	4	4	4	5	5	4	6	4	5	4.5	0.727273	1.66667	2.75	2	3	32	21	11	30	10	6	14	23	22	45	1	2	0	1	3	4	2	1	0
19	2	24	5	1	1	1	36.9	77.4148	36.8967	22	18	22	18	20	6	6	6	6	6	6	6	6	6	6	6	0.0909091	0	5.5	1.66667	4.33333	14	9	5	2	1	0	1	6	3	9	0	0	0	0	6	5	0	0	0
20	2	22	5	1	1	2	36.65	47.8765	-36.6497	23	18	18	23	20.5	4	4	6	6	4	4	6	6	5	5	5	0.545455	1.33333	4	1.33333	#NULL!	22	17	5	5	3	0	2	10	7	17	1	2	0	1	#NULL!	5	6	2	0
21	2	38	3	1	1	2	-99.49	63.2865	99.4861	20	31	31	20	25.5	7	6	7	6	9	8	9	9	6.5	8.75	7.625	3.09091	1	4.25	1	4	28	20	8	30	10	7	13	23	23	46	0	4	3	3	4	5	5	0	0
1	2	23	5	1	2	0	-31.49	56.5247	-31.49	19	16	#NULL!	#NULL!	17.5	5	5	4	4	5	5	6	5	4.5	5.25	4.875	0.0909091	0.666667	2.75	0.666667	1	#NULL!	#NULL!	#NULL!	17	7	7	3	17	7	24	1	0	0	1	1	4	0	1	0
2	2	38	3	1	2	0	-25.91	68.88	-25.91	25	23	#NULL!	#NULL!	24	2	1	1	1	2	1	1	1	1.25	1.25	1.25	0.818182	0.333333	4.5	1.33333	5.33333	#NULL!	#NULL!	#NULL!	10	5	2	3	16	24	40	0	0	2	1	6	4	3	0	0
3	2	26	3	1	2	0	-36.32	58.8024	-36.32	20	15	#NULL!	#NULL!	17.5	2	2	2	2	3	3	2	2	2	2.5	2.25	0.272727	0	5.5	1	0	#NULL!	#NULL!	#NULL!	11	5	2	4	22	23	45	0	0	0	0	0	3	3	0	3
4	2	59	4	1	2	0	-14.46	61.4647	-14.46	20	18	#NULL!	#NULL!	19	2	1	1	1	2	1	1	1	1.25	1.25	1.25	0.272727	0.666667	3.25	2	1	#NULL!	#NULL!	#NULL!	3	0	0	3	1	21	22	0	0	0	0	2	4	0	1	0
5	2	51	5	1	2	0	12.53	72.985	12.53	18	17	#NULL!	#NULL!	17.5	7	6	6	6	4	4	6	5	6.25	4.75	5.5	0	0	5	0.333333	#NULL!	#NULL!	#NULL!	#NULL!	4	3	0	1	10	0	10	0	0	0	0	#NULL!	5	1	0	#NULL!
6	2	29	2	1	2	0	2.05	56.6229	2.05	25	24	#NULL!	#NULL!	24.5	3	3	3	3	3	4	4	4	3	3.75	3.375	0	0	5.25	0	#NULL!	#NULL!	#NULL!	#NULL!	8	6	2	0	10	27	37	0	0	0	0	#NULL!	0	0	0	0
7	2	63	3	2	2	0	-10.1	51.2097	-10.1	26	22	#NULL!	#NULL!	24	1	1	1	1	1	1	1	1	1	1	1	0	0	2.75	0	0	#NULL!	#NULL!	#NULL!	33	12	6	15	17	19	36	0	0	0	0	0	5	0	0	0
8	2	55	3	1	2	0	52.73	58.3823	52.73	24	21	#NULL!	#NULL!	22.5	4	5	3	5	4	5	3	5	4.25	4.25	4.25	0.875	1.66667	3.75	2	#NULL!	#NULL!	#NULL!	#NULL!	8	4	1	3	14	9	23	2	1	#NULL!	0	#NULL!	4	1	2	5
9	2	41	4	1	2	0	-22.77	57.2077	-22.77	22	25	#NULL!	#NULL!	23.5	5	5	5	5	5	5	5	5	5	5	5	2.9	2	3	2	#NULL!	#NULL!	#NULL!	#NULL!	13	4	5	4	18	16	34	2	3	2	4	#NULL!	4	1	2	1
11	2	22	4	1	2	0	-4.66	54.0098	-4.66	19	12	#NULL!	#NULL!	15.5	4	1	1	1	4	1	1	1	1.75	1.75	1.75	0.272727	2.33333	4.5	0.666667	2	#NULL!	#NULL!	#NULL!	17	6	5	6	17	12	29	2	1	0	0	3	5	0	3	0
12	1	28	5	1	2	0	2.37	49.8525	2.37	24	23	#NULL!	#NULL!	23.5	3	3	2	2	3	3	2	2	2.5	2.5	2.5	0.545455	1	4	0	1	#NULL!	#NULL!	#NULL!	9	4	4	1	12	14	26	1	1	0	2	3	6	0	1	3
13	2	20	5	1	2	0	11.07	57.0587	11.07	24	24	#NULL!	#NULL!	24	7	4	4	4	7	4	4	4	4.75	4.75	4.75	0	0.333333	5.75	0	0	#NULL!	#NULL!	#NULL!	22	12	3	7	29	19	48	0	0	0	0	#NULL!	6	0	1	0
14	2	49	4	1	2	0	1.09	54.3329	1.09	23	17	#NULL!	#NULL!	20	8	7	4	4	8	7	4	4	5.75	5.75	5.75	1.90909	1.66667	4.5	0.666667	2.33333	#NULL!	#NULL!	#NULL!	22	10	5	7	21	24	45	0	1	0	3	3	5	0	0	5
15	2	22	5	1	2	0	-7.93	80.4048	-7.93	25	21	#NULL!	#NULL!	23	2	3	3	3	2	3	3	3	2.75	2.75	2.75	0.444444	0	5.25	0.333333	#NULL!	#NULL!	#NULL!	#NULL!	6	4	0	2	10	19	29	0	0	0	0	#NULL!	5	2	0	4
16	2	44	3	1	2	0	8.94	79.9712	8.94	24	22	#NULL!	#NULL!	23	8	8	9	8	8	8	9	8	8.25	8.25	8.25	1.72727	1.66667	5.5	0.333333	#NULL!	#NULL!	#NULL!	#NULL!	25	11	8	6	14	27	41	0	2	1	1	#NULL!	5	2	0	6
17	2	31	3	1	2	0	79.32	81.9778	79.32	23	23	#NULL!	#NULL!	23	5	5	5	2	5	6	5	2	4.25	4.5	4.375	0	0	0	0	0	#NULL!	#NULL!	#NULL!	40	14	9	17	31	16	47	4	3	3	4	4	2	2	4	4
18	1	44	3	1	2	0	0.09	112.006	0.09	26	28	#NULL!	#NULL!	27	5	5	5	5	5	5	5	5	5	5	5	3	2.33333	3.75	1	#NULL!	#NULL!	#NULL!	#NULL!	34	12	5	17	28	26	54	1	1	#NULL!	5	#NULL!	5	1	3	0
19	2	22	5	1	2	0	-27.65	74.1449	-27.65	26	22	#NULL!	#NULL!	24	7	7	7	7	7	7	8	8	7	7.5	7.25	0	0	4.5	0	0	#NULL!	#NULL!	#NULL!	6	2	2	2	10	0	10	0	0	0	0	0	6	0	0	0
20	2	47	3	1	2	0	12.15	53.7103	12.15	24	26	#NULL!	#NULL!	25	5	5	5	5	5	5	5	5	5	5	5	1.81818	1.33333	5	2	3	#NULL!	#NULL!	#NULL!	28	13	2	13	10	0	10	0	0	0	2	3	6	5	0	0
21	2	24	5	2	2	0	-3.53	48.9388	-3.53	23	18	#NULL!	#NULL!	20.5	3	3	4	4	3	3	4	4	3.5	3.5	3.5	0.636364	1	4.25	0.666667	4.66667	#NULL!	#NULL!	#NULL!	9	3	1	5	18	19	37	0	1	0	1	6	6	0	2	3
[truncated: 63 more columns]

## Sheet: Key
Variable label	Description	Coding
Subject	Participant number (seperate for clinical and control group)
Sex	Gender	1= male; 2=female
Age	Age
SES	Socioeconomic status	1=elementary school; 2=lower secondary education; 3= higher secondary education 4=higher education; 5=universitary education
hand_dominance	Which hand is dominant?	1=right; 2=left
group	Participant group	1=TMD patients; 2=healthy controls
painlocation	Which side of the temporomandibular joint is painful?	0=none; 1=left; 2=right
PSS_original	Point of Perceived Simulaneity (before re-coding with regard to painful side)
JND	Just Noticeable Difference
PSS	Point of Perceived Simulaneity after re-coding with regard to painful side)
tactor_intensity_left	Actual intensity of selected tactile stimulus at left side
tactor_intensity_right	Actual intensity of selected tactile stimulus at right side
int_obj_affected	Actual intensity of selected tactile stimulus at painful side (TMD sample only)
int_obj_other	Actual intensity of selected tactile stimulus at non-painful side (TMD sample only)
mean_objective	Actual intensity of selected tactile stimulus (average left and right)
intensleft1	Perceived intensity of tactile stimuli at left side after block 1
intensleft2	Perceived intensity of tactile stimuli at left side after block 2
intensleft3	Perceived intensity of tactile stimuli at left side after block 3
intensleft4	Perceived intensity of tactile stimuli at left side after block 4
intensright1	Perceived intensity of tactile stimuli at right side after block 1
intensright2	Perceived intensity of tactile stimuli at right side after block 2
intensright3	Perceived intensity of tactile stimuli at right side after block 3
intensright4	Perceived intensity of tactile stimuli at right side after block 4
meanleft	Perceived intensity of tactile stimuli at left side averaged over blocks
meanright	Perceived intensity of tactile stimuli at right side averaged over blocks
meanintensity	Perceived intensity of tactile stimuli averaged over sides and blocks
mpiin	Multidimensional Pain Inventory - subscale Pain Interference
mpips	Multidimensional Pain Inventory - subscale Pain Severity
mpilc	Multidimensional Pain Inventory - subscale Perceived Control
mpiad	Multidimensional Pain Inventory - subscale Affective Anxiety
mpisu	Multidimensional Pain Inventory - subscale Social Support
tsktmdtot	Tampa Scale for Kinesiophobia (TMD version) - total score
tskaa	Tampa Scale for Kinesiophobia (TMD version) - subscale Activity Avoidance
tsksf	Tampa Scale for Kinesiophobia (TMD version) - subscale Somatic Focus
pcstot	Pain Catastrophizing Scale - total score
pcsrum	Pain Catastrophizing Scale - subscale Rumination
pcsmag	Pain Catastrophizing Scale - subscale Magnification
pcshelp	Pain Catastrophizing Scale - subscale Helplesness
PVAQpain	Pain Vigilance and Awareness Questionnaire - subscale attention to pain
PVAQchan	Pain Vigilance and Awareness Questionnaire - subscale attention to changes in pain
PVAQTOT	Pain Vigilance and Awareness Questionnaire - total score
